# Supplementary material for: Excision and transfer of an integrating and conjugative element in a bacterial species with high recombination efficiency
Source: PubMed Central journal article supplement (PMC6586827; doi:10.1038/s41598-019-45429-z), 2019-06-20
Supplement: 41598_2019_45429_MOESM1_ESM.pdf [file 41598_2019_45429_MOESM1_ESM.pdf]

## **Supplementary Data**

### **Excision and transfer of an integrating and conjugative element in a bacterial species with high recombination efficiency**

Evelyn Weiss, Carolin Spicher, Rainer Haas and Wolfgang Fischer\*

Max von Pettenkofer Institute of Hygiene and Medical Microbiology, Faculty of Medicine,  
LMU Munich, Germany

Supplementary Figures S1-S5

Supplementary Tables S1 and S2

## Supplementary Figures

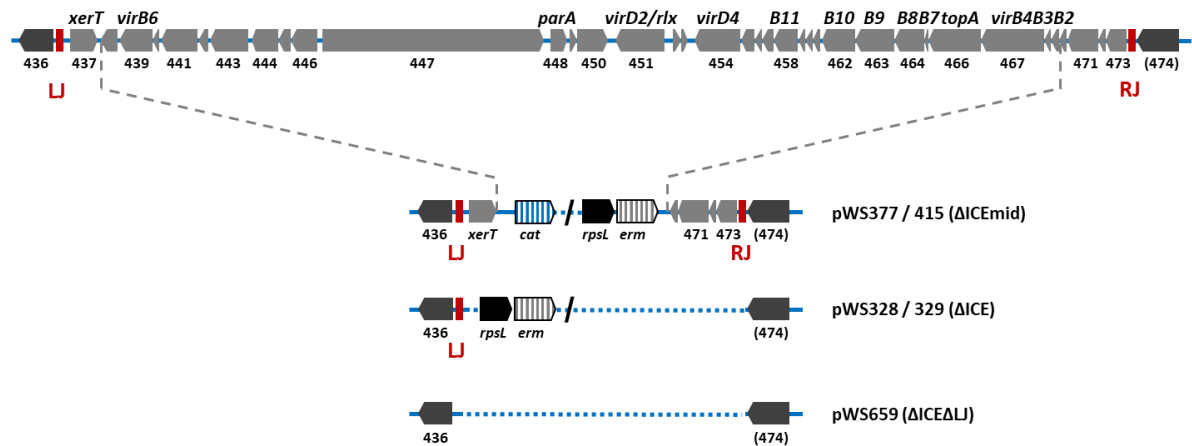

**Fig. S1. Construction of ICEHptfs4 deletion mutants.** For deletion of the major part of ICEHptfs4, left and right flanking regions including *xerT* (*hpp12\_437*) and *hpp12\_470-473* were cloned together with a *cat* or an *rpsL-ermC* cassette, resulting in plasmids pWS377 and pWS415, respectively. For complete deletion, flanking regions excluding these genes were cloned with an *rpsL-ermC* cassette or without any resistance marker (pWS328 and pWS329). In these strains, one of the junction sequences is still present, as in *H. pylori* strains which do not have an ICE insertion in this site. For plasmid pWS659, this junction sequence was removed as well.

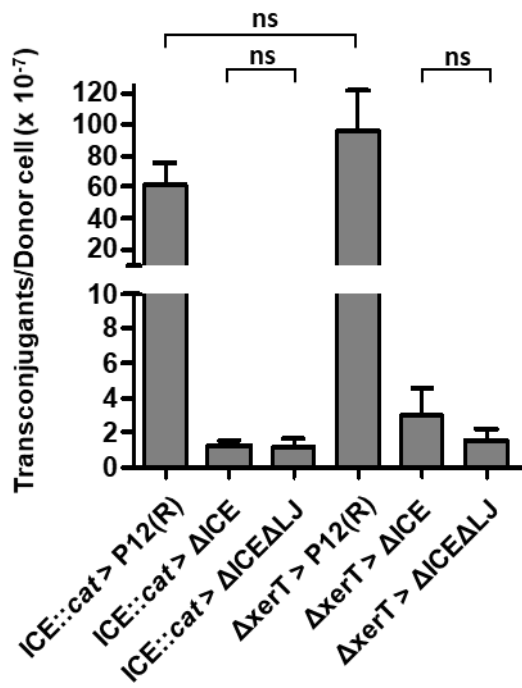

**Fig. S2. ICE transfer rates in excision- or integration-deficient donor or recipient mutants.**

Transfer frequencies are indicated as chloramphenicol/ kanamycin double-resistant clones per viable donor cell. Data represent average values from at least three independent experiments (from left to right, n=16, 14, 6, 5, 6, 3, 7, 5, 3) including standard errors of the mean. ns, no significant difference.

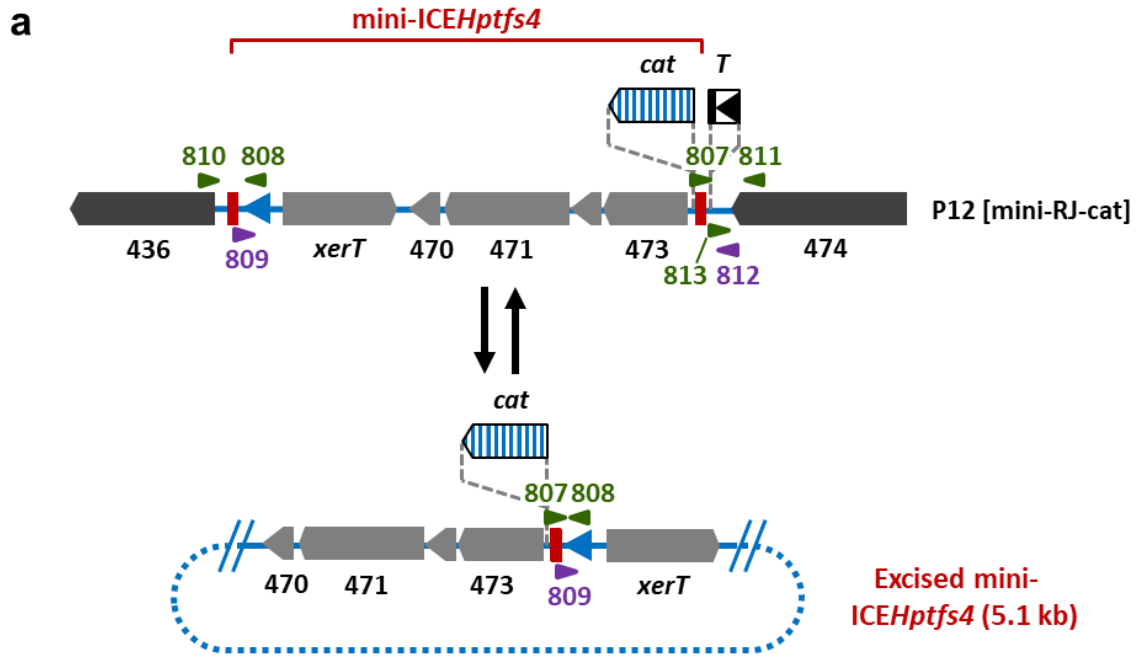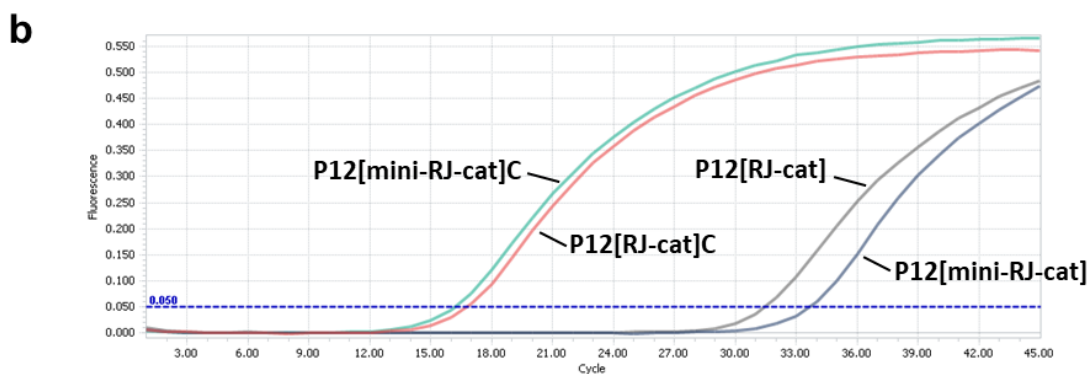

**Fig. S3. Quantitative determination of excision by qPCR.** (A) Primers (green arrowheads) and probes (purple arrowheads) for LightCycler amplification of circular or integrated forms of *ICEHptfs4*, as well as of the flanking genomic region, were designed as indicated. (B) Representative amplification curves of excision-selectable strains P12 [RJ-cat] and P12 [mini-RJ-cat] with or without chloramphenicol selection.

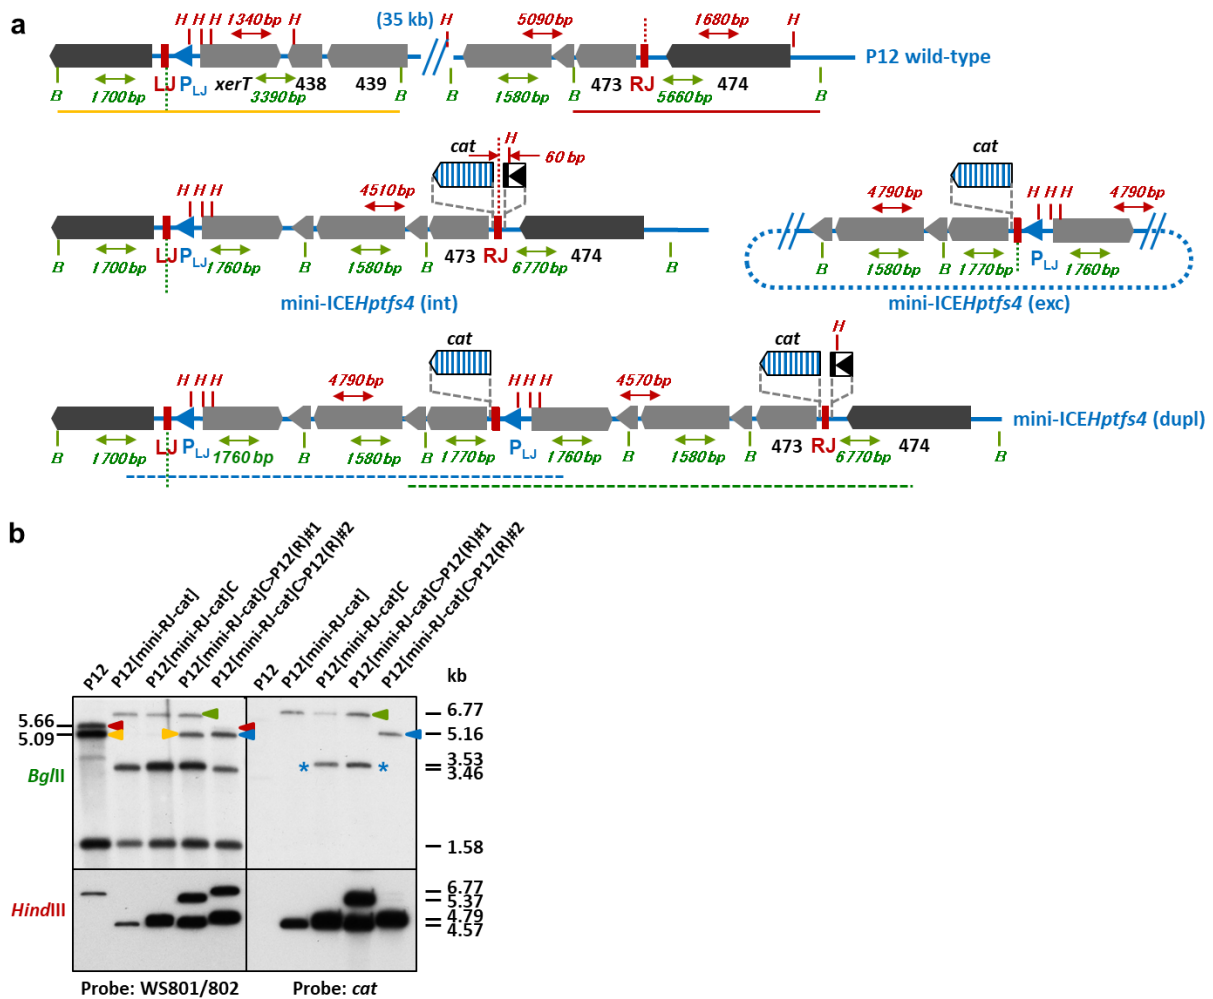

**Fig. S4. Southern blot analysis of mini-ICEHptfs4 excision and integration after transfer.**

(a) Schematic maps of ICEHptfs4, and of mini-ICEHptfs4 in its integrated, excised and double-integrated forms are shown with locations of *Bgl*III (B) and *Hind*III (H) sites. (b) Southern blots of *Bgl*III- or *Hind*III-digested genomic DNA of the indicated strains developed with probes comprising either mini-ICEHptfs4 (WS801/802), or the *cat* cassette only. Additional copies of the *cat* cassette in the chloramphenicol-selected P12 [mini-RJ-cat] strain and in one transconjugant clone are indicated by asterisks. The yellow and red arrowheads indicate 5.09 kb, or 5.66 kb *Bgl*III fragments covering the LJ or RJ in the wild-type, respectively (corresponding to the yellow or red lines in panel a). The green arrowheads (6.77 kb *Bgl*III fragments) correspond to the RJ region of integrated mini-ICEHptfs4 including the *cat* cassette, which would be the result of transfer of this region into a wild-type recipient. However, since

both P12 [mini-RJ-cat]C and the first transconjugant clone contain two different copies of the *cat* cassette, the only explanation is that a DNA fragment containing both *cat* copies had been transferred (dashed green line in panel a). The blue arrowheads (5.16 kb *Bgl*II fragments) result from transfer of a LJ region including the *cat* cassette (dashed blue line in panel a) to the wild-type recipient.

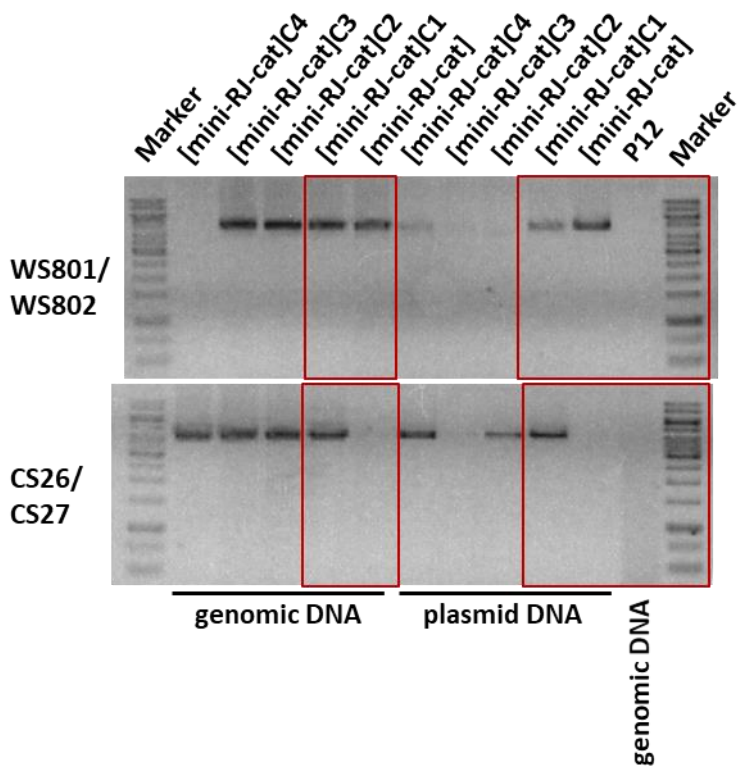

**Fig. S5. Uncropped images of the gels shown in Fig. 6b.** PCR products obtained with WS801/WS802 or CS26/CS27 primers from either genomic DNA or plasmid preparations of the indicated strains (P12 wild-type, P12 [mini-RJ-cat], or 4 individual clones of P12 [mini-RJ-cat] selected on chloramphenicol plates) were loaded, as indicated. The areas used for generating the cropped images shown in Fig. 6b (after horizontal mirror inversion) are indicated by red boxes.

## Supplementary Tables

**Table S1. *H. pylori* strains used in this study.**

| Strain                                           | Genotype or description                                                                                                                                                                            | Reference        |
|--------------------------------------------------|----------------------------------------------------------------------------------------------------------------------------------------------------------------------------------------------------|------------------|
| G27                                              | wt                                                                                                                                                                                                 | (13)             |
| P12                                              | wt                                                                                                                                                                                                 | (21)             |
| P12 ICE:: <i>cat</i>                             | Donor; ICE <i>Hptfs4</i> :: <i>cat</i> (insertion between <i>hpp12_453</i> and <i>hpp12_454</i> ); $\Delta$ <i>recA</i> :: <i>erm</i>                                                              | (13)             |
| G27 ICE:: <i>cat</i>                             | Donor; ICE <i>Hptfs4</i> :: <i>cat</i> (insertion between <i>hpg27_974</i> and <i>hpg27_975</i> ); $\Delta$ <i>recA</i> :: <i>erm</i>                                                              | This study       |
| P12 $\Delta$ <i>xerT</i>                         | $\Delta$ <i>xerT</i> :: <i>cat</i> ; $\Delta$ <i>recA</i> :: <i>erm</i>                                                                                                                            | (13)             |
| P12 $\Delta$ <i>virB6</i>                        | $\Delta$ <i>virB6</i> :: <i>cat</i> ; $\Delta$ <i>recA</i> :: <i>erm</i>                                                                                                                           | This study       |
| P12 $\Delta$ <i>virD4</i>                        | $\Delta$ <i>virD4</i> :: <i>cat</i> ; $\Delta$ <i>recA</i> :: <i>erm</i>                                                                                                                           | (13)             |
| P12(R)                                           | Recipient; $\Delta$ <i>moeB</i> :: <i>aphA-3</i>                                                                                                                                                   | (13)             |
| P12 $\Delta$ ICEmid                              | $\Delta$ <i>hpp12_438-hpp12_469</i> :: <i>cat</i> (pWS377); $\Delta$ <i>recA</i> :: <i>erm</i>                                                                                                     | This study       |
| P12 $\Delta$ ICE                                 | $\Delta$ ICE <i>Hptfs4</i> :: <i>rpsL-erm</i> ; $\Delta$ <i>moeB</i> :: <i>aphA-3</i>                                                                                                              | This study       |
| P12 $\Delta$ <i>comB</i>                         | $\Delta$ <i>comB7-10</i> :: <i>aphA-3</i>                                                                                                                                                          | (7)              |
| P12 $\Delta$ <i>comEC</i>                        | $\Delta$ <i>comEC</i> :: <i>aphA-3</i>                                                                                                                                                             | This study       |
| P12 $\Delta$ <i>recA</i>                         | $\Delta$ <i>recA</i> :: <i>erm</i> ; $\Delta$ <i>moeB</i> :: <i>aphA-3</i>                                                                                                                         | This study       |
| P12 $\Delta$ <i>dprA</i>                         | $\Delta$ <i>dprA</i> :: <i>rpsL-erm</i> ; $\Delta$ <i>moeB</i> :: <i>aphA-3</i>                                                                                                                    | This study       |
| P12 [pCS19]                                      | ICE <i>Hptfs4</i> :: <i>cat-aphA-3</i> (insertion upstream of <i>hpp12_473</i> ); <i>rpsL-erm-T-HP1395</i> (insertion outside ICE <i>Hptfs4</i> RJ)                                                | This study       |
| P12 [pWS643]                                     | ICE <i>Hptfs4</i> :: <i>cat</i> (insertion upstream of <i>hpp12_473</i> ); <i>rpsL-erm-T-HP1395</i> (insertion outside ICE <i>Hptfs4</i> RJ)                                                       | This study       |
| P12 [RJ- <i>cat</i> ]                            | ICE <i>Hptfs4</i> :: <i>cat</i> (insertion upstream of <i>hpp12_473</i> ); T-HP1395 (insertion outside ICE <i>Hptfs4</i> RJ)                                                                       | This study       |
| P12 [RJ- <i>cat</i> ; $\Delta$ P <sub>LJ</sub> ] | ICE <i>Hptfs4</i> :: <i>cat</i> (insertion upstream of <i>hpp12_473</i> ); T-HP1395 (insertion outside ICE <i>Hptfs4</i> RJ); $\Delta$ P <sub>LJ</sub>                                             | This study       |
| P12 [mini-RJ- <i>cat</i> ]                       | mini-ICE <i>Hptfs4</i> :: <i>cat</i> ( $\Delta$ <i>hpp12_438-hpp12_469</i> marker-free; <i>cat</i> insertion upstream of <i>hpp12_473</i> ); T-HP1395 (insertion outside ICE <i>Hptfs4</i> RJ)     | This study       |
| P12 $\Delta$ ICE $\Delta$ LJ                     | $\Delta$ ICE <i>Hptfs4</i> (marker-free; pWS659); $\Delta$ <i>moeB</i> :: <i>aphA-3</i>                                                                                                            | This study       |
| P12 $\Delta$ LJ/RJ                               | marker-free deletion of LJ and RJ (pWS643; pWS664; pWS666; pWS665); ICE <i>Hptfs4</i> :: <i>cat</i> (insertion between <i>hpp12_453</i> and <i>hpp12_454</i> ); $\Delta$ <i>recA</i> :: <i>erm</i> | This study       |
| P12 <i>cagPAI</i> :: <i>cat</i>                  | Donor; $\Delta$ <i>cagP</i> :: <i>cat</i> ; $\Delta$ <i>recA</i> :: <i>erm</i>                                                                                                                     | This study       |
| P12 $\Delta$ PAI(R)                              | Recipient; $\Delta$ <i>cagPAI</i> (marker-free, with flanking regions from strain 26695); $\Delta$ <i>moeB</i> :: <i>aphA-3</i>                                                                    | (24); this study |



**Table S2. Oligonucleotide primers used in this study.**

| Primer | Sequence (5'-3')                                | Position in P12 genome | Remarks                      |
|--------|-------------------------------------------------|------------------------|------------------------------|
| BK5    | CGGGATCCCTCATAGAGTTAGCAAATGATAAAGG              | 454353-454328          | <i>Bam</i> HI                |
| BK6    | AGTCGTCGACCAAGGCAAGTAGTGGAGCG                   | 455573-455591          | <i>Sal</i> I                 |
| CS6    | ATGTCGACTTAGGCAGTATGATCTCTAC                    | 343776-343757          | <i>Sal</i> I                 |
| CS7    | CGGGATCCGCATGATTTTAGCGTGCATG                    | 344583-344602          | <i>Bam</i> HI                |
| CS23   | AGTATCTAGAGATCCACGTTGAAAATCT                    | <i>cat</i> cassette    | <i>Xba</i> I                 |
| CS24   | TGACGCGGCCGCACACAAAGACTATATCCGTATC              | 451987-452008          | <i>Not</i> I                 |
| CS25   | ACTAGAGCTCGTCTCAAACGCCTTTATATC                  | 451953-451934          | <i>Sac</i> I                 |
| CS26   | AGCTGCGGCCGCAATTCCTAGATATGATTCTTAGAG            | 492717-492742          | <i>Not</i> I                 |
| CS27   | GATCGAGCTCGACCATGCAAGAAAGAGTTT                  | 492724-492695          | <i>Sac</i> I                 |
| CS36   | GATCGAGCTCGCCTGATTTTGCATGACGAAC                 | 492814-492794          | <i>Sac</i> I                 |
| CS37   | GTACGGATCCTCCCATAGCGATTTCAATTTCC                | 491765-491786          | <i>Bam</i> HI                |
| CS38   | CATGGCGGCCGCGGTTAGGGTTTTCTTGTAAGAC              | 492845-492866          | <i>Not</i> I                 |
| CS39   | CTAGCCGCGGAAAAGGCATCATCTGGCACAC                 | 493761-493741          | <i>Sac</i> II                |
| CS79   | GATCGAGCTCGCTAAGGAAGCTAAAATGGAG                 | <i>cat</i> cassette    | <i>Sac</i> I                 |
| CS80   | ACGTGTCGACCTTGGATATAGGGTTTAGGCG                 | T-HP1395 terminator    | <i>Sal</i> I                 |
| CS81   | GATCGAGCTCCACCAAAGCTTTAAGCCAAGC                 | T-HP1395 terminator    | <i>Sac</i> I                 |
| RH136  | ATAAGAATGCGGCCGCTAAATGACTAAGGAAGCTAAA<br>ATGGAG | <i>cat</i> cassette    | <i>Not</i> I                 |
| SR111  | GATCGGATCCTTTTAGTTTCTTGTCCTCT                   | 1431301-1431320        | <i>Bam</i> HI                |
| SR112  | GATCGGATCCTAGCGTTACTCCCTAAATTG                  | 1430473-1430454        | <i>Bam</i> HI                |
| WS362  | TATTTAAGCTTTGAGCTCCC                            | 452307-452287          |                              |
| WS363  | TTTCTTACAGCCTGTGCCACC                           | 492501-492521          |                              |
| WS406  | GCGGATCCAAAATTGGTCTTATGATTC                     | 573638-573618          | <i>Bam</i> HI                |
| WS407  | ACGCGTCGACAATCGGTCTTTTCAATTTGG                  | 573960-573979          | <i>Sal</i> I                 |
| WS429  | ACCGCTCGAGATTATTGTATTTGCTTAATAGG                | 451106-451127          | <i>Xho</i> I                 |
| WS430  | GCGGATCCGAATTCATTCTTTTAAATATG                   | 452031-452011          | <i>Bam</i> HI, <i>Eco</i> RI |
| WS431  | ACCGGTCGACGAATCTTTCTTTGACTTCTTGTC               | 492779-492797          | <i>Sal</i> I, <i>Eco</i> RI  |
| WS432  | GATCGCGGCCGCTTTATTGTGGACAGGTGG                  | 493649-493631          | <i>Not</i> I                 |
| WS436  | CGGGATCCGAAAATTTAAGTGGTTTGTG                    | 453598-453579          | <i>Bam</i> HI                |
| WS437  | CGGGTACCTTATGATGCTAAAATTTCC                     | 491931-491949          | <i>Kpn</i> I                 |
| WS785  | ACCGCTGCAGGACCATGCAAGAAAGAG                     | 492716-492698          | <i>Pst</i> I                 |
| WS793  | GAATCTTTTCTTTGACTTCTTG                          | 492773-492794          |                              |
| WS794  | TAAATATGAAGATACGGATATAG                         | 452018-451996          |                              |
| WS800  | ACTGGTCGACGAATCTTTTCTTTGACTTCTTGT               | 492773-492795          | <i>Sal</i> I                 |
| WS801  | ACGTGTCGACTAGAGAATGCAATTATTTTCTAATC             | 492766-492742          | <i>Sal</i> I                 |

|       |                                                 |               |                            |
|-------|-------------------------------------------------|---------------|----------------------------|
| WS802 | ACGTGTCGACGGATCCTTTAAGTTAAATCTAATCTACA<br>AAATG | 452032-452058 | <i>SalI</i> , <i>BamHI</i> |
| WS803 | ACGTGTCGACTTAAATATGAAGATACGGATATAGTC            | 452019-451994 | <i>SalI</i>                |
| WS804 | ACGTGAGCTCTTGGTATAACAACGGAGTAATC                | 452079-452058 | <i>SacI</i>                |
| WS805 | GTATTCATGGGAGCTCAAAG                            | 452279-452298 |                            |
| WS807 | AATTCCTAGATATTGATTTCTTAGAGATTAGAAAA             | 492717-492751 | qPCR primer                |
| WS808 | TTTAAAGCTTTGAGCTCCCATGA                         | 452305-452283 | qPCR primer                |
| WS809 | AGCTCACATTCTTTTCCTGTTTTTCCTTTATCCTTTC           | 452124-452161 | 5'-6-FAM; 3'-BHQ-1         |
| WS810 | TGTAAACACAAAGACTATATCCGTATCTTC                  | 451981-452011 | qPCR primer                |
| WS811 | CAGAGATTTATTGAATTTCAAGCGT                       | 492987-492963 | qPCR primer                |
| WS812 | CAACTCCAATCCAGCCTGATTTTGCATG                    | 492827-492800 | 5'-6-FAM; 3'-BHQ-1         |
| WS813 | GAATCTTTTCTTTGACTTCTTGTTTCGT                    | 492773-492799 | qPCR primer                |
